# Supplementary material for: Transcriptional Regulation of lncRNA Genes by Histone Modification in Alzheimer's Disease
Source: Biomed Res Int. 2016 Oct 16;2016:3164238. doi: 10.1155/2016/3164238 (PMC5086382; doi:10.1155/2016/3164238)
Supplement: Supplementary file 3 [file 3164238.f3.txt]

test_id	gene_id	gene	locus	sample_1	sample_2	status	value_1	value_2	log2(fold_change)	test_stat	p_value	q_value	significant
XLOC_041790	XLOC_041790	RP23-27C9.6	chr6:121245912-121272685	C1	C2	OK	0.33627	14.1592	5.39597	6.58324	5.00E-05	0.00216928	yes
XLOC_048146	XLOC_048146	9330175E14Rik	chr8:94422898-94479753	C1	C2	OK	0.12768	4.239	5.05311	2.48043	5.00E-05	0.00216928	yes
XLOC_039131	XLOC_039131	Gm43068	chr5:120730175-120749850	C1	C2	OK	0.134452	3.7903	4.81715	2.27699	5.00E-05	0.00216928	yes
XLOC_007704	XLOC_007704	Dhx58os	chr11:100687416-100704258	C1	C2	OK	0.210053	4.79891	4.51388	3.44784	5.00E-05	0.00216928	yes
XLOC_038031	XLOC_038031	Gm15792	chr5:110306710-110337513	C1	C2	OK	0.217206	3.33844	3.94203	5.99244	5.00E-05	0.00216928	yes
XLOC_000348	XLOC_000348	Gm16094,Gm17017	chr1:85536400-85709665	C1	C2	OK	0.562131	7.11768	3.66243	3.4678	5.00E-05	0.00216928	yes
XLOC_024907	XLOC_024907	A330040F15Rik	chr19:12564545-12596566	C1	C2	OK	0.362467	4.34641	3.5839	5.66988	5.00E-05	0.00216928	yes
XLOC_000178	XLOC_000178	Gm28177	chr1:52077260-52162193	C1	C2	OK	4.3203	44.1746	3.35402	14.2714	5.00E-05	0.00216928	yes
XLOC_042495	XLOC_042495	Gm20531	chr6:124720711-124738040	C1	C2	OK	0.546465	5.51658	3.33557	5.93475	5.00E-05	0.00216928	yes
XLOC_021554	XLOC_021554	A930015D03Rik	chr17:35991866-36121424	C1	C2	OK	2.42616	22.1621	3.19135	3.80768	5.00E-05	0.00216928	yes
XLOC_021163	XLOC_021163	Gm11131	chr17:35262951-35474209	C1	C2	OK	6.43546	53.9928	3.06865	9.83167	5.00E-05	0.00216928	yes
XLOC_045667	XLOC_045667	AU020206	chr7:75768229-75782099	C1	C2	OK	1.36896	11.3913	3.05677	6.46067	5.00E-05	0.00216928	yes
XLOC_041960	XLOC_041960	Gm20559,Gm43197	chr6:3331077-3346128	C1	C2	OK	0.743918	5.95652	3.00125	1.76703	5.00E-05	0.00216928	yes
XLOC_004233	XLOC_004233	Gm26847	chr10:128230589-128253116	C1	C2	OK	0.682015	5.38658	2.98149	5.03075	5.00E-05	0.00216928	yes
XLOC_001478	XLOC_001478	Ptprv	chr1:135108496-135132594	C1	C2	OK	0.423969	3.22143	2.92567	0.574905	0.00025	0.00905955	yes
XLOC_001504	XLOC_001504	A130071D04Rik	chr1:138063444-138175288	C1	C2	OK	1.02257	7.54739	2.88378	4.30617	5.00E-05	0.00216928	yes
XLOC_042238	XLOC_042238	Gm17034	chr6:82738317-82774438	C1	C2	OK	0.437544	3.01425	2.7843	3.58294	5.00E-05	0.00216928	yes
XLOC_006993	XLOC_006993	Gm11626	chr11:101448428-101466184	C1	C2	OK	0.631198	4.2022	2.73498	2.88129	0.00035	0.0119557	yes
XLOC_007286	XLOC_007286	4930403D09Rik	chr11:34226871-34783871	C1	C2	OK	0.989953	6.57824	2.73227	6.39417	5.00E-05	0.00216928	yes
XLOC_021530	XLOC_021530	C4a	chr17:34671181-34823464	C1	C2	OK	3.69048	24.0142	2.70201	5.90872	5.00E-05	0.00216928	yes
XLOC_006456	XLOC_006456	Gm12000	chr11:11686159-11772625	C1	C2	OK	1.11531	6.87483	2.62389	3.29233	5.00E-05	0.00216928	yes
XLOC_033890	XLOC_033890	Gm11832	chr4:11558968-11615718	C1	C2	OK	1.11609	6.79894	2.60686	4.50025	5.00E-05	0.00216928	yes
XLOC_026815	XLOC_026815	Gm14091	chr2:118814215-118837691	C1	C2	OK	0.345192	2.08753	2.59632	4.41472	5.00E-05	0.00216928	yes
XLOC_045075	XLOC_045075	Gm15133,Gm15135	chr7:104244489-104353390	C1	C2	OK	1.07289	6.46978	2.59222	2.76995	5.00E-05	0.00216928	yes
XLOC_041488	XLOC_041488	4930533I22Rik,RP24-491O6.1	chr6:57476696-57665770	C1	C2	OK	2.21682	13.3019	2.58507	6.6304	5.00E-05	0.00216928	yes
XLOC_021677	XLOC_021677	Gm26637	chr17:78850104-78892500	C1	C2	OK	2.25265	13.4194	2.57462	10.5706	5.00E-05	0.00216928	yes
XLOC_051815	XLOC_051815	Gm9888	chr9:114756890-114782264	C1	C2	OK	0.470442	2.74941	2.54703	2.96719	0.00185	0.0440315	yes
XLOC_041375	XLOC_041375	Gm42962	chr6:38917097-39084923	C1	C2	OK	1.16439	6.70385	2.52542	2.90786	5.00E-05	0.00216928	yes
XLOC_000210	XLOC_000210	Gm37760	chr1:58795463-58847224	C1	C2	OK	0.771961	4.2558	2.46283	3.23811	5.00E-05	0.00216928	yes
XLOC_033867	XLOC_033867	Gm26857	chr4:3678111-3791058	C1	C2	OK	1.87679	10.2868	2.45445	4.64762	5.00E-05	0.00216928	yes
XLOC_042083	XLOC_042083	4930599N23Rik	chr6:39086292-39206731	C1	C2	OK	3.7431	19.4621	2.37836	3.6703	5.00E-05	0.00216928	yes
XLOC_006538	XLOC_006538	4930469K13Rik	chr11:33973960-34098554	C1	C2	OK	0.573238	2.92801	2.35272	2.77621	0.0003	0.0105719	yes
XLOC_031420	XLOC_031420	Gm43729	chr3:127536585-127630896	C1	C2	OK	1.75217	8.7259	2.31616	5.35793	5.00E-05	0.00216928	yes
XLOC_042511	XLOC_042511	Gm28809	chr6:125460259-125509135	C1	C2	OK	10.9998	51.6719	2.23191	8.31144	5.00E-05	0.00216928	yes
XLOC_006847	XLOC_006847	Slfn5os	chr11:82942340-82964849	C1	C2	OK	1.11421	5.11456	2.19858	7.17811	5.00E-05	0.00216928	yes
XLOC_045019	XLOC_045019	Gm26522	chr7:88278066-88310961	C1	C2	OK	3.09083	14.0438	2.18387	5.42088	5.00E-05	0.00216928	yes
XLOC_014217	XLOC_014217	Gm15629	chr14:75176814-75206285	C1	C2	OK	1.94843	8.25151	2.08235	3.76308	5.00E-05	0.00216928	yes
XLOC_044992	XLOC_044992	6330403N20Rik	chr7:80294487-80316399	C1	C2	OK	1.38519	5.44556	1.975	4.65638	5.00E-05	0.00216928	yes
XLOC_021555	XLOC_021555	A930015D03Rik	chr17:35991866-36121424	C1	C2	OK	2.29053	8.30318	1.85798	2.54091	0.0004	0.0133083	yes
XLOC_045911	XLOC_045911	Gm15676	chr7:126800205-126809201	C1	C2	OK	0.896415	3.19309	1.83272	2.48625	0.0002	0.00754863	yes
XLOC_039055	XLOC_039055	Gm15736	chr5:113613018-113650728	C1	C2	OK	0.721052	2.48715	1.78632	3.15149	0.0001	0.00412112	yes
XLOC_038448	XLOC_038448	Gm19719	chr5:149265057-149288289	C1	C2	OK	1.53115	5.07282	1.72817	2.71883	0.00025	0.00905955	yes
XLOC_021131	XLOC_021131	Gm20496	chr17:34199315-34216277	C1	C2	OK	2.96085	9.64325	1.70351	4.52706	5.00E-05	0.00216928	yes
XLOC_001005	XLOC_001005	Gm37618	chr1:33453861-33669771	C1	C2	OK	3.23114	10.4024	1.68681	2.46604	5.00E-05	0.00216928	yes
XLOC_037923	XLOC_037923	Gm42603	chr5:96793381-96845933	C1	C2	OK	3.34295	10.6451	1.67099	4.78579	5.00E-05	0.00216928	yes
XLOC_041717	XLOC_041717	RP23-56N1.3	chr6:112273767-112330440	C1	C2	OK	1.24184	3.92845	1.66147	2.89625	5.00E-05	0.00216928	yes
XLOC_045796	XLOC_045796	Gm15133	chr7:104244489-104353390	C1	C2	OK	1.6585	5.14845	1.63426	1.98343	0.0009	0.0252901	yes
XLOC_037979	XLOC_037979	Gm42793	chr5:104435120-104441025	C1	C2	OK	3.46406	10.568	1.60916	4.50382	5.00E-05	0.00216928	yes
XLOC_051355	XLOC_051355	Gm38292	chr9:32422773-32541544	C1	C2	OK	1.00059	2.9913	1.57993	2.5451	0.00015	0.00587997	yes
XLOC_000381	XLOC_000381	Gm20528	chr1:88055392-88219272	C1	C2	OK	0.845471	2.49622	1.56192	2.45317	0.00045	0.0145649	yes
XLOC_000114	XLOC_000114	Gm37020	chr1:37100632-37187586	C1	C2	OK	0.873378	2.53096	1.53501	3.60561	5.00E-05	0.00216928	yes
XLOC_025152	XLOC_025152	Gm10143	chr19:10198367-10203927	C1	C2	OK	3.28208	9.16576	1.48165	4.55264	5.00E-05	0.00216928	yes
XLOC_045162	XLOC_045162	RP23-136A14.3	chr7:125552256-125578326	C1	C2	OK	1.21313	3.35722	1.46854	2.88379	5.00E-05	0.00216928	yes
XLOC_007201	XLOC_007201	Gm11974	chr11:6525590-6528760	C1	C2	OK	4.71376	12.1073	1.36093	2.44024	0.00015	0.00587997	yes
XLOC_045952	XLOC_045952	Gm15503	chr7:128373620-128418748	C1	C2	OK	10.0197	25.721	1.3601	4.53254	5.00E-05	0.00216928	yes
XLOC_034724	XLOC_034724	Aknaos	chr4:63381357-63403278	C1	C2	OK	0.886637	2.16329	1.28681	2.83209	5.00E-05	0.00216928	yes
XLOC_023112	XLOC_023112	C030005K06Rik	chr18:50042729-50092088	C1	C2	OK	1.67468	4.00148	1.25664	2.48385	0.00025	0.00905955	yes
XLOC_031382	XLOC_031382	Gm42929	chr3:121424235-121458340	C1	C2	OK	12.8752	30.4981	1.24412	5.12297	5.00E-05	0.00216928	yes
XLOC_024973	XLOC_024973	Gm28991	chr19:38481181-38784617	C1	C2	OK	4.31865	10.0644	1.22061	4.77315	5.00E-05	0.00216928	yes
XLOC_031209	XLOC_031209	Gm17690	chr3:96161899-96172419	C1	C2	OK	2.02542	4.65396	1.20024	2.81312	5.00E-05	0.00216928	yes
XLOC_000728	XLOC_000728	Gm15852	chr1:169928654-169934515	C1	C2	OK	2.93535	6.73294	1.19771	2.72393	5.00E-05	0.00216928	yes
XLOC_034982	XLOC_034982	Gm12981	chr4:132492051-132510573	C1	C2	OK	3.44892	7.82408	1.18178	4.57296	5.00E-05	0.00216928	yes
XLOC_014105	XLOC_014105	Gm38316	chr14:50944373-50964375	C1	C2	OK	3.84522	8.70647	1.17902	3.28856	5.00E-05	0.00216928	yes
XLOC_032097	XLOC_032097	Gm43109	chr3:116110139-116141016	C1	C2	OK	6.46466	14.4845	1.16387	4.8798	5.00E-05	0.00216928	yes
XLOC_016794	XLOC_016794	Gm17473	chr15:42424792-42704616	C1	C2	OK	1.81311	4.05207	1.16019	3.50318	5.00E-05	0.00216928	yes
XLOC_021120	XLOC_021120	Gm19412	chr17:33916228-33929286	C1	C2	OK	5.26801	11.6539	1.14549	5.23275	5.00E-05	0.00216928	yes
XLOC_034999	XLOC_034999	Gm12977	chr4:133847289-133887752	C1	C2	OK	2.44193	5.397	1.14413	3.59523	5.00E-05	0.00216928	yes
XLOC_048213	XLOC_048213	Gm38318	chr8:108792182-108947926	C1	C2	OK	0.808007	1.78448	1.14307	3.55951	5.00E-05	0.00216928	yes
XLOC_045769	XLOC_045769	Gm15635	chr7:99657672-99707131	C1	C2	OK	4.47666	9.69597	1.11496	3.8572	5.00E-05	0.00216928	yes
XLOC_007515	XLOC_007515	Gm12336	chr11:75409569-75423340	C1	C2	OK	2.89425	6.23557	1.10733	3.39613	5.00E-05	0.00216928	yes
XLOC_031968	XLOC_031968	Gm20628	chr3:96267074-96279001	C1	C2	OK	8.08789	16.978	1.06983	4.42249	5.00E-05	0.00216928	yes
XLOC_038636	XLOC_038636	Gm10459	chr5:33639786-33672205	C1	C2	OK	5.30135	10.9546	1.0471	2.3075	0.00065	0.0196565	yes
